# Supplementary material for: Role of Agricultural Management in the Provision of Ecosystem Services in Warm Climate Vineyards: Functional Prediction of Genes Involved in Nutrient Cycling and Carbon Sequestration
Source: MDPI journal article supplement (doi:10.3390/plants12030527), 2023-01-23
Supplement: s1 [file s1]

[illegible]



|                       |        |        |        |        |   |   |        |        |
|-----------------------|--------|--------|--------|--------|---|---|--------|--------|
| <i>Veroniceae</i>     | 0.0050 | 0.0029 | -      | -      | - | - | 0.0025 | 0.0025 |
| <i>Unidentifiable</i> | -      | -      | 0.0025 | 0.0025 | - | - | -      | -      |
